# Supplementary material
Source: PubMed Central journal article supplement (PMC5736105)
Supplement: NIHMS73661-supplement-Fig__S1.pdf [file NIHMS73661-supplement-Fig__S1.pdf]

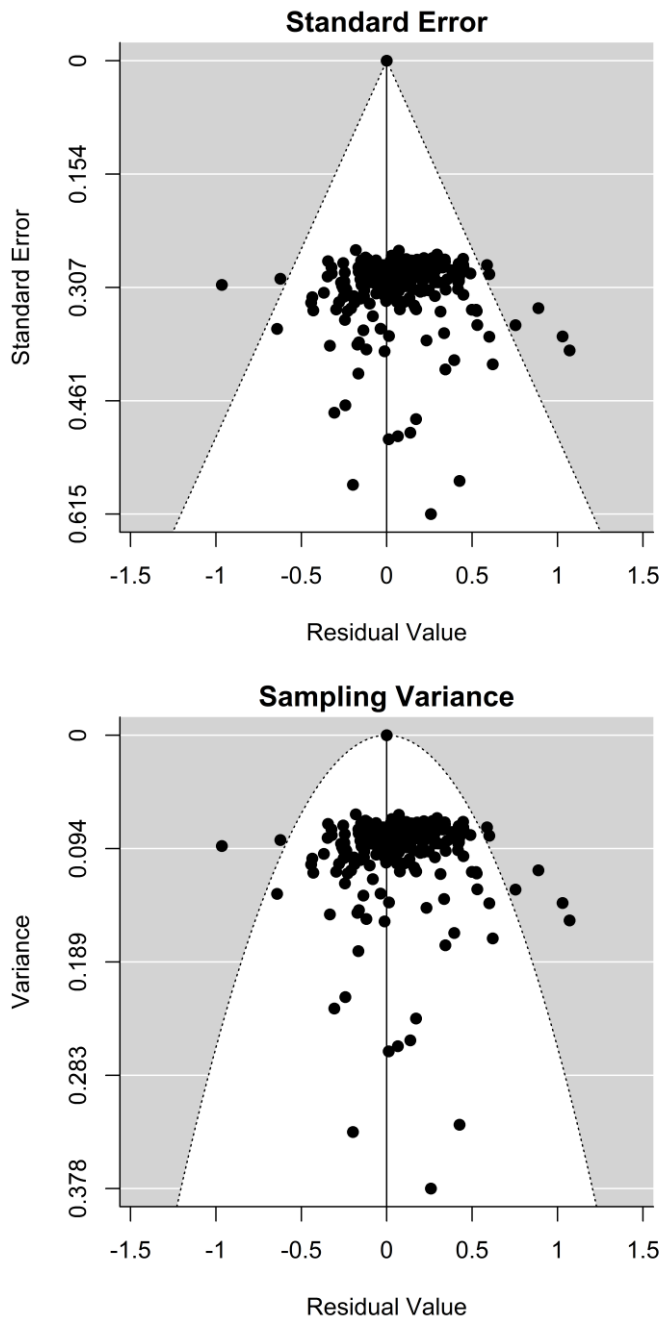

Figure S1: Funnel plots illustrating standard error and sampling variance of data points quantifying the effects of salvage logging on biodiversity. The points correspond to the effect of salvage logging on the numbers of species measured as Hedges'  $d$ . Dashed lines indicate the region within which 95% of studies are expected to lie in the absence of both biases and heterogeneity. The solid vertical line indicates the no intervention effect. Plots correspond to the data that underlie Fig. 3a in the main manuscript. Data distribution does not indicate a substantial data heterogeneity.
