# Supplementary material
Source: PubMed Central journal article supplement (PMC5736105)
Supplement: NIHMS73661-supplement-Table_S1.pdf [file NIHMS73661-supplement-Table_S1.pdf]

Table S1: Statistical results of multilevel linear mixed-effects models with Hedges' d as response variable, taxonomic group and years after disturbance as predictors and study site as a random effect (i.e. Hedges' d ~ taxonomic group + time since disturbance + (1|study site) - 1). Significant p-values are given in bold and indicate differences in numbers of species. Results correspond to Fig. 2a in the main manuscript.

| Variable                | Estimate                    | Std. error                 | z-value               | p-pvalue         |
|-------------------------|-----------------------------|----------------------------|-----------------------|------------------|
| Years after disturbance | <b>-5.34 e<sup>-3</sup></b> | <b>1.05 e<sup>-3</sup></b> | <b>-5.08</b>          | <b>&lt;0.001</b> |
| Amphibians              | 3.44 e <sup>-1</sup>        | 5.37 e <sup>-1</sup>       | 6.41 e <sup>-1</sup>  | 0.522            |
| Ants                    | -1.06 e <sup>-1</sup>       | 1.46 e <sup>-1</sup>       | -7.25 e <sup>-1</sup> | 0.468            |
| Bats                    | -2.96 e <sup>-1</sup>       | 1.87 e <sup>-1</sup>       | -1.58                 | 0.113            |
| Bees and Wasps          | -5.21 e <sup>-2</sup>       | 5.01 e <sup>-1</sup>       | -1.04 e <sup>-1</sup> | 0.917            |
| Birds                   | <b>-1.99 e<sup>-1</sup></b> | <b>6.55 e<sup>-2</sup></b> | <b>-3.04</b>          | <b>0.002</b>     |
| Carabids                | <b>1.99 e<sup>-1</sup></b>  | <b>5.85 e<sup>-2</sup></b> | <b>3.40</b>           | <b>0.001</b>     |
| Epigeal lichens         | <b>-5.56 e<sup>-1</sup></b> | <b>1.11 e<sup>-1</sup></b> | <b>-5.00</b>          | <b>&lt;0.001</b> |
| Epigeal mosses          | <b>-1.46 e<sup>-1</sup></b> | <b>6.09 e<sup>-2</sup></b> | <b>-2.40</b>          | <b>0.016</b>     |
| Epigeal spiders         | <b>1.97 e<sup>-1</sup></b>  | <b>6.28 e<sup>-2</sup></b> | <b>3.14</b>           | <b>0.002</b>     |
| Epixylic lichens        | <b>-6.47 e<sup>-1</sup></b> | <b>7.18 e<sup>-2</sup></b> | <b>-9.01</b>          | <b>&lt;0.001</b> |
| Epixylic mosses         | <b>-3.43 e<sup>-1</sup></b> | <b>6.65 e<sup>-2</sup></b> | <b>-5.16</b>          | <b>&lt;0.001</b> |
| Harvestman              | -3.77 e <sup>-1</sup>       | 3.39 e <sup>-1</sup>       | -1.11                 | 0.266            |
| Hoverflies              | 7.47 e <sup>-2</sup>        | 6.61 e <sup>-2</sup>       | 1.13                  | 0.259            |
| Land snails             | 4.44 e <sup>-1</sup>        | 1.76 e <sup>-1</sup>       | 2.52                  | 0.012            |
| Nocturnal moths         | -3.16 e <sup>-1</sup>       | 2.34 e <sup>-1</sup>       | -1.35                 | 0.176            |
| Non-saproxyllic beetles | 1.26 e <sup>-1</sup>        | 1.27 e <sup>-1</sup>       | 9.92 e <sup>-1</sup>  | 0.321            |
| Reptiles                | -3.86 e <sup>-1</sup>       | 5.17 e <sup>-1</sup>       | -7.47 e <sup>-1</sup> | 0.455            |
| Rodents                 | -6.34 e <sup>-2</sup>       | 9.65 e <sup>-2</sup>       | -6.57 e <sup>-1</sup> | 0.511            |
| Saproxyllic beetles     | <b>-2.96 e<sup>-1</sup></b> | <b>6.57 e<sup>-2</sup></b> | <b>-4.51</b>          | <b>&lt;0.001</b> |
| Scuttle flies           | -5.69 e <sup>-2</sup>       | 1.75 e <sup>-1</sup>       | -3.26 e <sup>-1</sup> | 0.745            |
| Springtails             | <b>-3.40 e<sup>-1</sup></b> | <b>1.72 e<sup>-1</sup></b> | <b>-1.97</b>          | <b>0.049</b>     |
| True bugs               | 4.69 e <sup>-2</sup>        | 6.42 e <sup>-2</sup>       | 7.31 e <sup>-1</sup>  | 0.465            |
| Vascular plants         | -5.70 e <sup>-2</sup>       | 5.64 e <sup>-2</sup>       | -1.01                 | 0.312            |
| Wood-inhabiting fungi   | <b>-5.39 e<sup>-2</sup></b> | <b>7.92 e<sup>-2</sup></b> | <b>-6.81</b>          | <b>&lt;0.001</b> |
