# Supplementary material
Source: PubMed Central journal article supplement (PMC5736105)
Supplement: NIHMS73661-supplement-Table_S2.pdf [file NIHMS73661-supplement-Table_S2.pdf]

Table S2: Statistical results of multilevel linear mixed-effects models with Hedges' d as response variable, the interaction of saproxylic/ non-saproxylic and disturbance type as a predictor as well as study site and taxonomic groups as random effects (i.e. Hedges' d ~ time since disturbance + disturbance type: saproxylic/ non-saproxylic + (1|study site + taxonomic group) -1). Statistical results are based on a simultaneous inference procedure to compare the effects of salvage logging on numbers of species across saproxylic and non-saproxylic species groups within each disturbance type. Significant p-values are given in bold.

| <b>Variable</b>                      | <b>Estimate</b>             | <b>Std_error</b>           | <b>t_value</b>       | <b>p_value</b>   |
|--------------------------------------|-----------------------------|----------------------------|----------------------|------------------|
| <b>Years after disturbance</b>       | <b>-5.21 e<sup>-3</sup></b> | <b>1.05 e<sup>-3</sup></b> | <b>-4.99</b>         | <b>&lt;0.001</b> |
| Insect disturbance                   |                             |                            |                      |                  |
| Non-Saproxylic vs. Saproxylic        | 4.29 e <sup>-2</sup>        | 1.38 e <sup>-1</sup>       | 3.10 e <sup>-1</sup> | 0.757            |
| Wildfire                             |                             |                            |                      |                  |
| <b>Non-Saproxylic vs. Saproxylic</b> | <b>4.49 e<sup>-1</sup></b>  | <b>1.64 e<sup>-1</sup></b> | <b>2.73</b>          | <b>0.006</b>     |
| Windstorm                            |                             |                            |                      |                  |
| <b>Non-Saproxylic vs. Saproxylic</b> | <b>2.42 e<sup>-1</sup></b>  | <b>1.19 e<sup>-1</sup></b> | <b>2.03</b>          | <b>0.043</b>     |
