# Supplementary material
Source: PubMed Central journal article supplement (PMC5736105)
Supplement: NIHMS73661-supplement-Table_S3.pdf [file NIHMS73661-supplement-Table_S3.pdf]

Table S3: Statistical results of linear mixed-effects models with pseudo F-value as response variable, taxonomic group and years after disturbance as predictors and study site as a random effect (i.e.  $F\text{-value} \sim \text{taxonomic group} + \text{time since disturbance} + (1|\text{study site}) - 1$ ). Significant p-values are given in bold and indicate differences in community composition between salvaged and unsalvaged plots. Results correspond to Fig. 2b in the main manuscript.

| Variable                     | Estimate                   | Std. error                 | t-value                    | p-pvalue         |
|------------------------------|----------------------------|----------------------------|----------------------------|------------------|
| Years after disturbance      | -6.44 e <sup>-2</sup>      | 5.67 e <sup>-2</sup>       | -1.14                      | 0.256            |
| Ants                         | 3.03                       | 3.45                       | 8.77 e <sup>-1</sup>       | 0.381            |
| Bats                         | 9.39 e <sup>-1</sup>       | 3.29                       | 2.85 e <sup>-1</sup>       | 0.775            |
| <b>Birds</b>                 | <b>5.47</b>                | <b>7.33 e<sup>-1</sup></b> | <b>7.47</b>                | <b>&lt;0.001</b> |
| <b>Carabids</b>              | <b>3.38</b>                | <b>7.57 e<sup>-1</sup></b> | <b>4.47</b>                | <b>&lt;0.001</b> |
| Epigeal lichens              | 1.08                       | 1.94                       | 5.58 e <sup>-1</sup>       | 0.577            |
| Epigeal mosses               | 2.35                       | 1.54                       | 1.53                       | 0.126            |
| <b>Epigeal spiders</b>       | <b>4.49</b>                | <b>7.62 e<sup>-1</sup></b> | <b>5.89</b>                | <b>&lt;0.001</b> |
| <b>Epixylic lichens</b>      | <b>2.10 e<sup>-1</sup></b> | <b>1.54</b>                | <b>1.36 e<sup>-1</sup></b> | <b>&lt;0.001</b> |
| Epixylic mosses              | 2.93                       | 1.54                       | 1.91                       | 0.057            |
| Nocturnal moths              | 1.56                       | 3.29                       | 4.75 e <sup>-1</sup>       | 0.635            |
| Non-saproxyllic beetles      | 3.98                       | 3.45                       | 1.15                       | 0.249            |
| Rodents                      | 1.12                       | 3.29                       | 3.41 e <sup>-1</sup>       | 0.733            |
| <b>Saproxyllic beetles</b>   | <b>7.46</b>                | <b>1.44</b>                | <b>5.19</b>                | <b>&lt;0.001</b> |
| Scuttle flies                | 2.31                       | 3.29                       | 7.02 e <sup>-1</sup>       | 0.483            |
| Vascular plants              | 2.12                       | 1.01                       | 2.09                       | 0.037            |
| <b>Wood inhabiting fungi</b> | <b>1.46 e<sup>-1</sup></b> | <b>1.54</b>                | <b>9.51</b>                | <b>&lt;0.001</b> |
