# Supplementary material
Source: PubMed Central journal article supplement (PMC5736105)
Supplement: NIHMS73661-supplement-Table_S4.pdf [file NIHMS73661-supplement-Table_S4.pdf]

Table S4: Statistical results of linear mixed-effects models with pseudo F-value as response variable, the interaction of saproxylic/ non-saproxylic and disturbance type as a predictor as well as study site and taxonomic groups as random effects (i.e. F-value ~ time since disturbance + disturbance type: saproxylic/ non-saproxylic + (1|study site + taxonomic group) -1). Statistical results based on a simultaneous inference procedure to compare the effects of salvage logging on community composition across saproxylic and non-saproxylic species groups within each disturbance type. Significant p-values are given in bold.

| <b>Variable</b>                      | <b>Estimate</b>       | <b>Std_error</b>     | <b>t_value</b>        | <b>p_value</b>   |
|--------------------------------------|-----------------------|----------------------|-----------------------|------------------|
| Years after disturbance              | -3.13 e <sup>-2</sup> | 5.97 e <sup>-2</sup> | -5.25 e <sup>-1</sup> | 0.599            |
| Insect disturbance                   |                       |                      |                       |                  |
| Non-Saproxylic vs. Saproxylic        | -5.66                 | 3.66                 | -1.54                 | 0.123            |
| Windstorm                            |                       |                      |                       |                  |
| <b>Non-Saproxylic vs. Saproxylic</b> | <b>-8.80</b>          | <b>2.48</b>          | <b>-3.55</b>          | <b>&lt;0.001</b> |
